# Supplementary material
Source: Springer Nature journal article supplement (https://www.springermedizin.de/resource/supplementary/12957_2012_1020_MOESM3_ESM.pdf/9561622)

# Overall Survival

Proportion

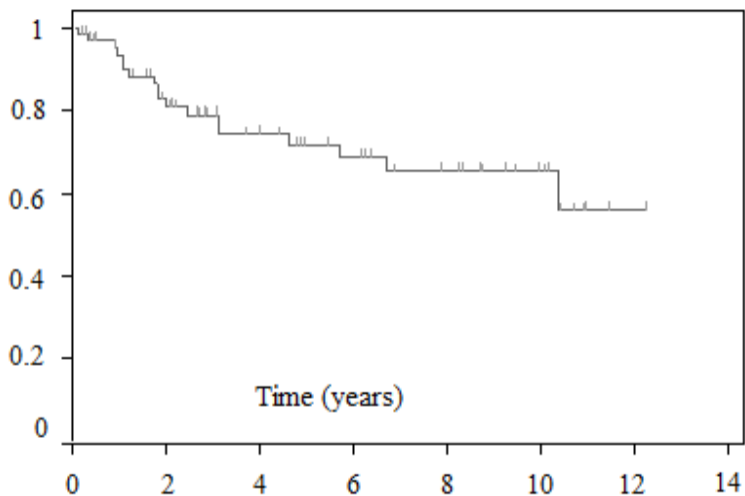

Time (years)

Numbers at Risk

66 44 30 23 17 9 1 0

Supplement: MOESM3 [file 9561622]
